# Supplementary material for: A highly stable chain-based EuIII metal–organic framework as a turn-on and blue-shift luminescent sensor for dipicolinic acid
Source: Royal Society of Chemistry journal article supplement (doi:10.1039/d3dt01057k), 2023-01-01
Supplement: d3dt01057k1.pdf [file d3dt01057k1.pdf]

## *Electronic Supplementary Information (ESI)*

### **A highly stable chain-based Eu<sup>III</sup> metal-organic framework as the turn-on and blue-shift luminescent sensor for 2,6-dipicolinic acid**

**Li Wang,<sup>a</sup> Yu-Lian Zhu,<sup>b</sup> Teng-Fei Zheng,<sup>a</sup> Zi-Hao Zhu,<sup>a\*</sup> Yan Peng,<sup>a</sup> Yong-Quan Wu,<sup>b</sup> Jing-Lin Chen,<sup>a</sup> Sui-Jun Liu<sup>a\*</sup> and He-Rui Wen<sup>a</sup>**

<sup>a</sup>School of Chemistry and Chemical Engineering, Jiangxi Provincial Key Laboratory of Functional Molecular Materials Chemistry, Jiangxi University of Science and Technology, Ganzhou 341000, Jiangxi Province, P.R. China

<sup>b</sup>School of Chemistry and Chemical Engineering, Gannan Normal University, Ganzhou 341000, Jiangxi Province, P.R. China

---

\*Corresponding authors. E-mail: sjliu@jxust.edu.cn (S.-J. Liu), zhuzihao@jxust.edu.cn (Z.-H. Zhu).

## Materials and instrumentations

All chemical reagents were obtained from commercial sources and used without further purification. Notably, H<sub>2</sub>BTDB was purchased by Jilin Chinese Academy of Sciences - Yanshen Technology Co., Ltd. and the NMR spectrum is provided in Fig. S1. The powder X-ray diffraction (PXRD) patterns were recorded by Rigaku MiniFlex 600. The simulated PXRD pattern of single-crystal data was obtained using the Mercury (Hg) software, which is freely available on the Internet at <http://www.iucr.org>. Thermogravimetric analysis (TGA) was performed under a N<sub>2</sub> flow at a heating rate of 10 K min<sup>-1</sup> from 25 to 1000 °C on a NETZSCH STA2500 thermal analyzer. IR spectra in the range of 4000–400 cm<sup>-1</sup> were collected with KBr particles on a Bruker Alpha FT-IR spectrometer. The fluorescence lifetime decays were recorded on a HORIBA Fluorolog fluorescence spectrophotometer. The UV-vis adsorption spectra were collected on a UV-2550 (SHIMADZU) spectrophotometer. Scanning electron microscopy (SEM) was carried out on MLA650F SEM (FIE, USA).

## Crystallographic studies for JXUST-38

Single crystal X-ray diffraction data of **JXUST-38** were recorded on a Bruker D8 QUEST diffractometer under 296(2) K and Mo-K $\alpha$  radiation ( $\lambda = 0.71073 \text{ \AA}$ ) by  $\omega$  scan mode. SAINT program was used for diffraction profile integration.<sup>S1</sup> The SHELXT program of SHELXTL software package was used to solve the structure directly, and the full matrix least square method was used to refine the structure.<sup>S2</sup> The non-hydrogen atoms were situated in successive difference Fourier syntheses and refined by anisotropic thermal parameters on  $F^2$ . Theoretically, the hydrogen atoms of ligands are formed on specific atoms, and isotropic refinement was carried out by a fixed thermal factor.

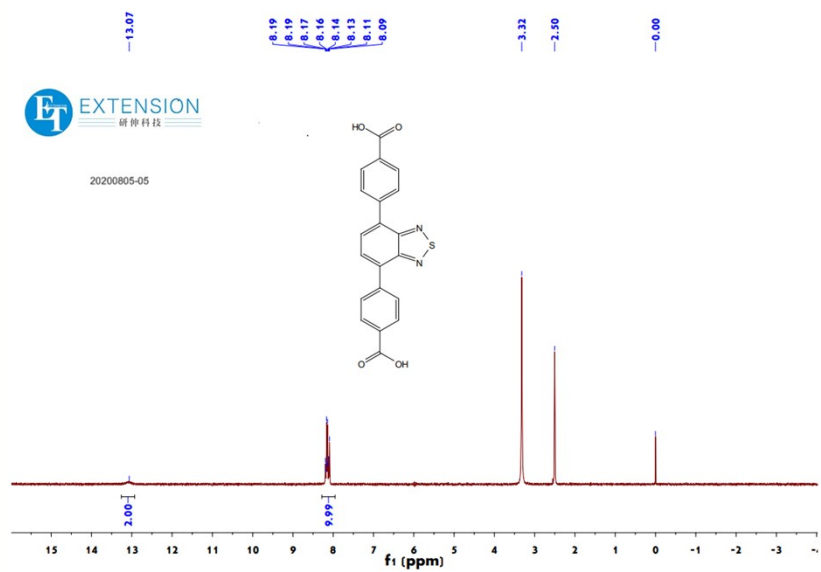

Fig. S1 NMR spectrum of the H<sub>2</sub>BTDB ligand.

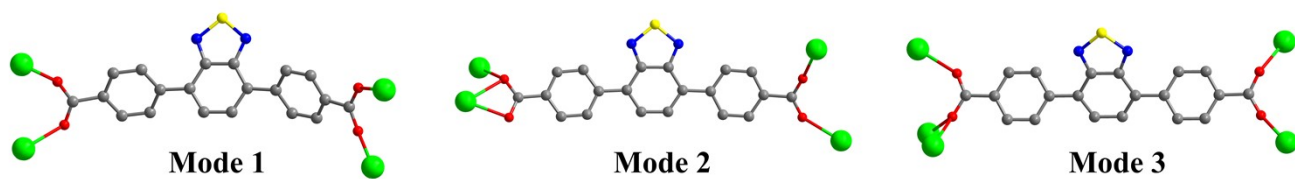

Fig. S2 The coordination modes of H<sub>2</sub>BTDB ligand in JXUST-38.

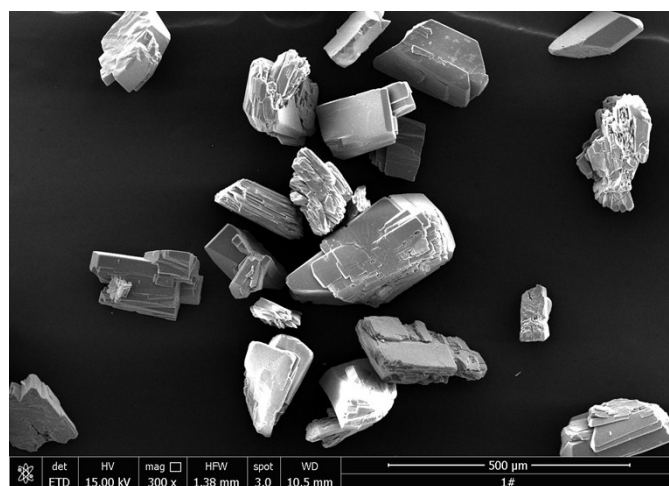

(a)

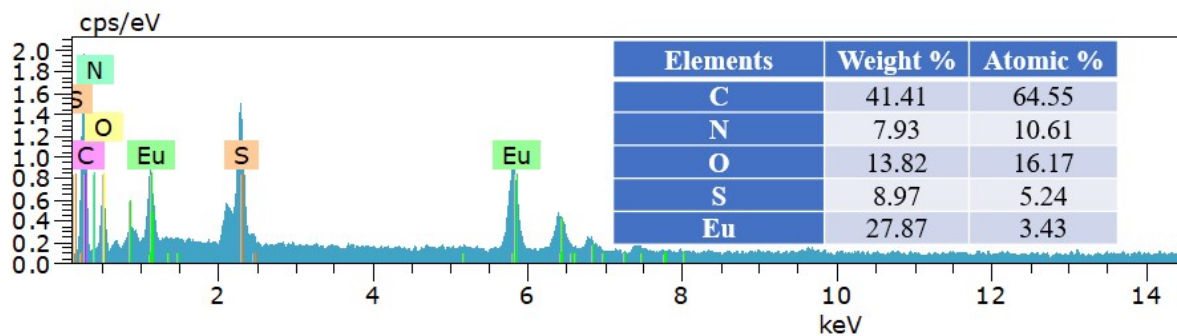

(b)

**Fig. S3** (a) Scanning electron microscopy of JXUST-38. (b) Elemental analysis from scanning electron microscope-energy dispersive X-ray analysis of JXUST-38.

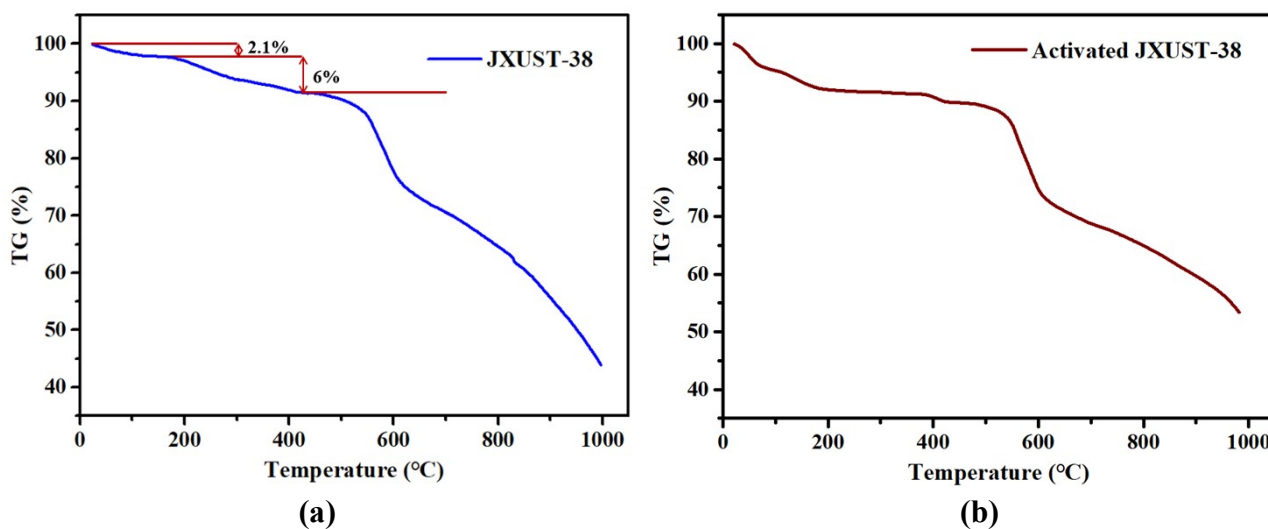

**Fig. S4** The TGA curves of (a) JXUST-38 and (b) the activated JXUST-38.

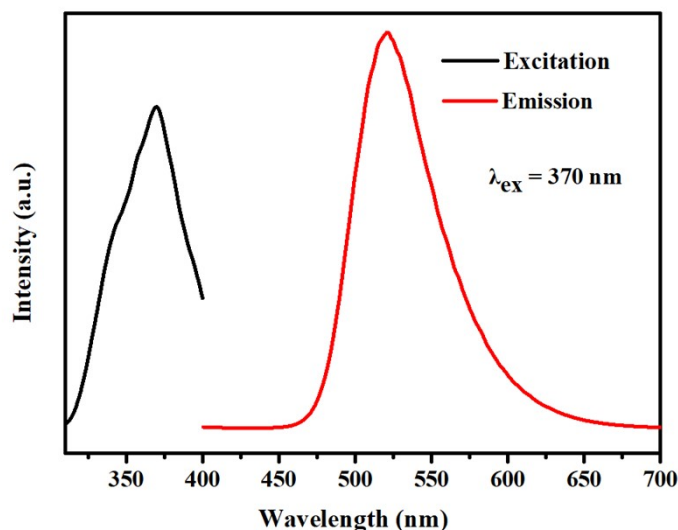

**Fig. S5** The solid-state excitation and emission spectra of JXUST-38.

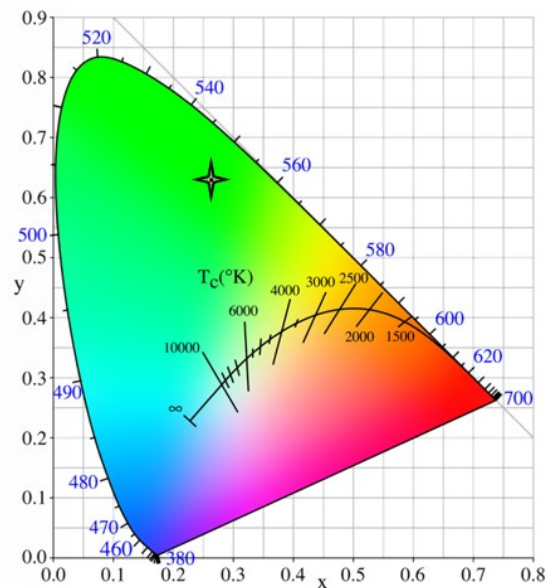

**Fig. S6** CIE chromaticity diagram displaying the color coordinate of **JXUST-38**.

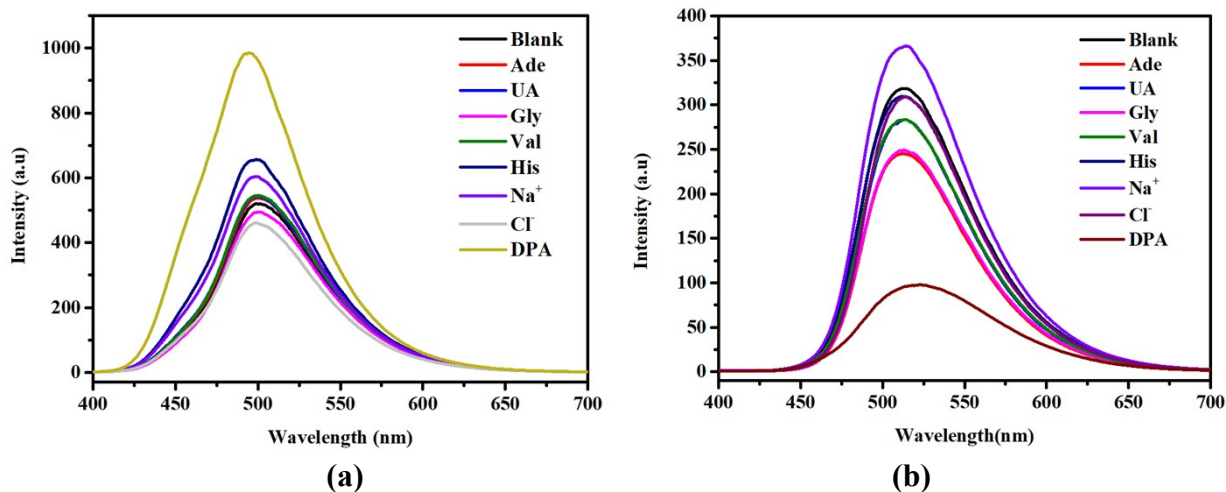

**Fig. S7** Luminescence intensity with specific recognition of DPA in (a) EtOH and (b) aqueous solutions.

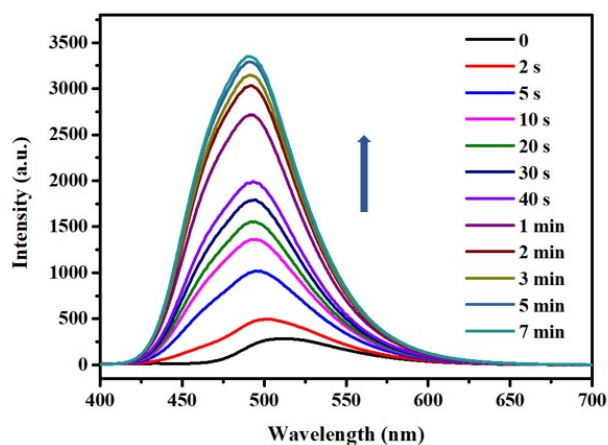

**Fig. S8** Time-dependent emission spectra of **JXUST-38** after adding DPA at room temperature.

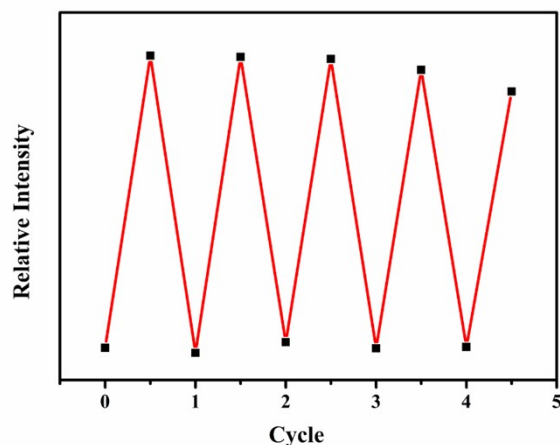

**Fig. S9** Relative luminescent intensity of **JXUST-38** after five cycles of recycling experiments for DPA.

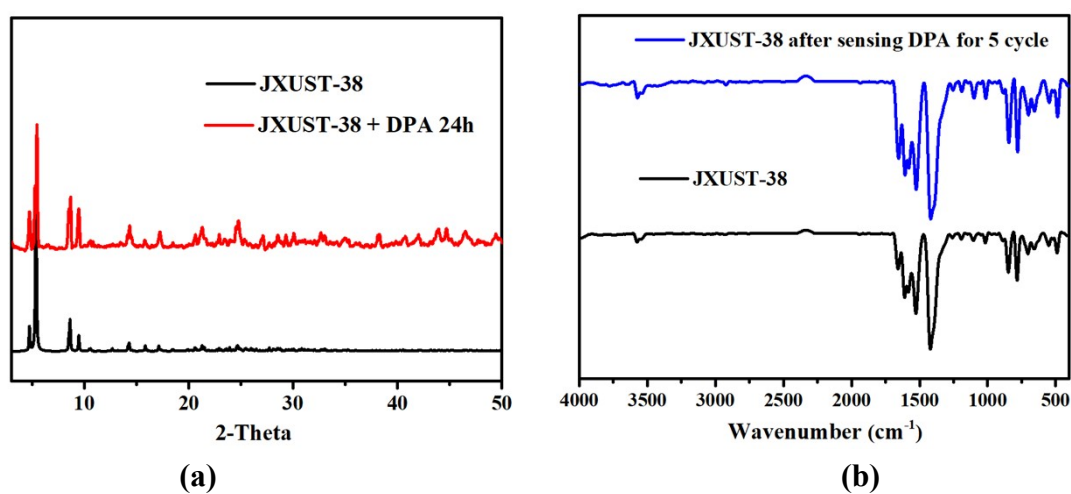

**Fig. S10** (a) The PXRD patterns **JXUST-38** with the fresh sample and soaked in DMF solution containing DPA for 24 hours. (b) The IR spectra of **JXUST-38** and **JXUST-38** after sensing DPA for 5 cycles.

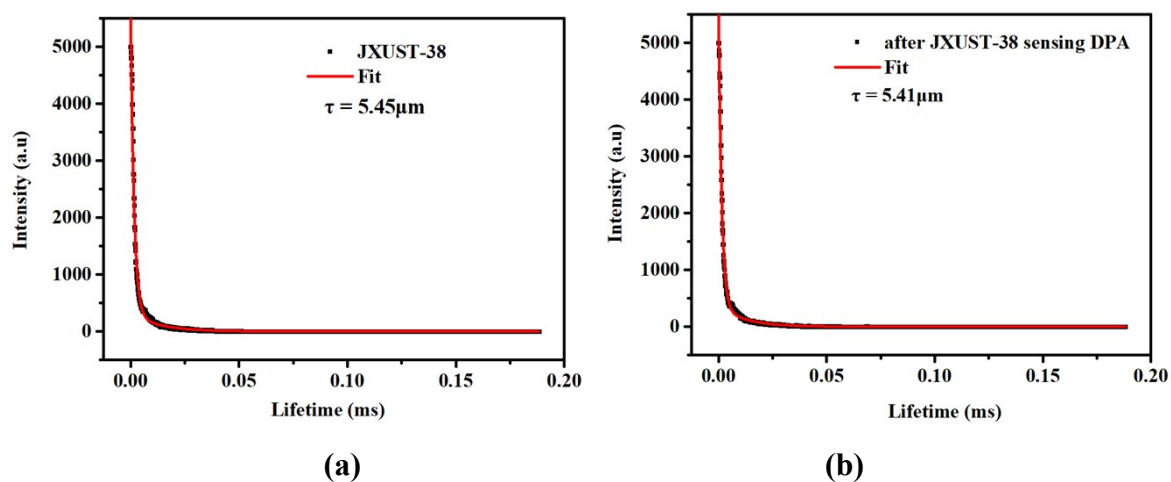

**Fig. S11** The luminescence decay curves of (a) **JXUST-38** and (b) **JXUST-38@DPA** at room temperature.

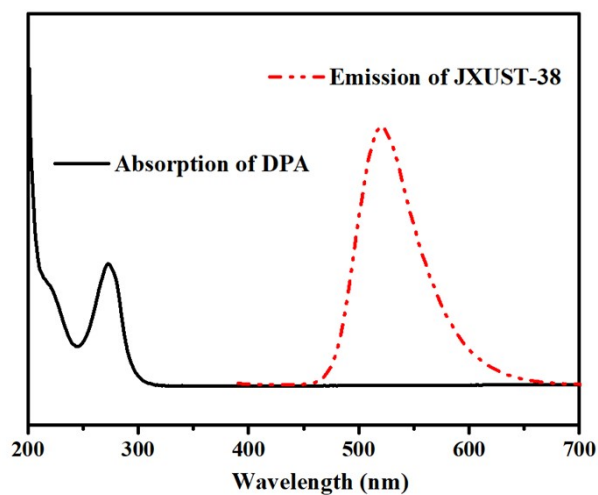

**Fig. S12** The emission spectrum of **JXUST-38** and the UV-vis absorption spectrum of **DPA**.

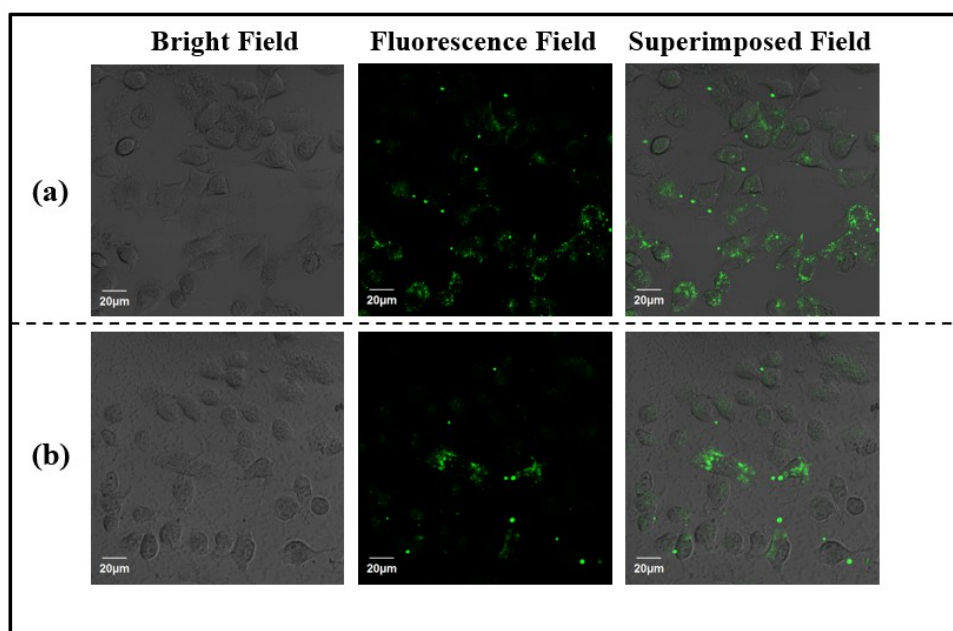

**Fig. S13** Bright-field transmission image, fluorescence image and superimposed field image of (a) **JXUST-38** and (b) **JXUST-38@DPA**.

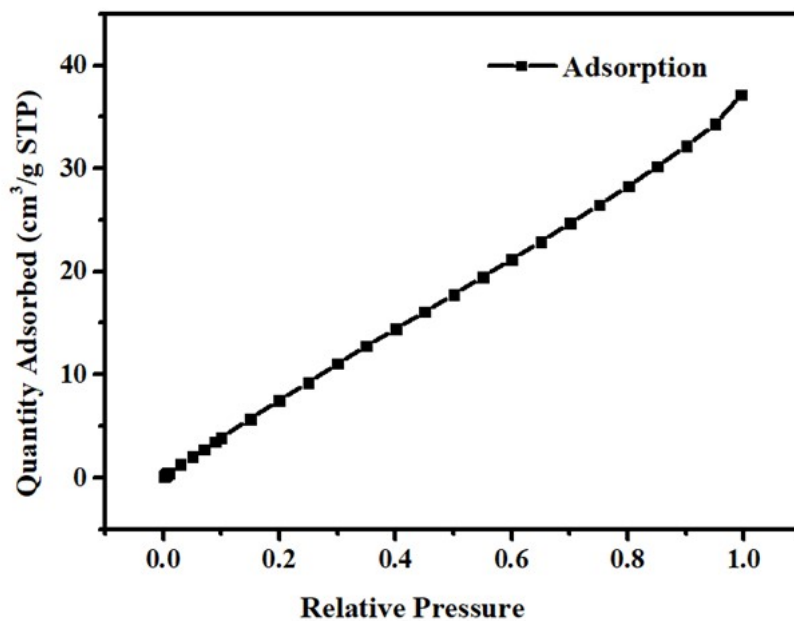

**Fig. S14** The N<sub>2</sub> adsorption isotherms for **JXUST-38** at 77 K. **JXUST-38** does not exhibit a significant microporous structure based on the isotherms, which may be due to its lower porosity.



**Table S1.** Crystal data and structure refinements for **JXUST-38**.

| Compound                                                                                             | <b>JXUST-38</b>                |
|------------------------------------------------------------------------------------------------------|--------------------------------|
| formula                                                                                              | $C_{60}H_{32}Eu_3N_6O_{16}S_3$ |
| <i>Mr</i>                                                                                            | 1644.97                        |
| <i>T</i> (K)                                                                                         | 293(2)                         |
| crystal system                                                                                       | triclinic                      |
| space group                                                                                          | $P\bar{1}$                     |
| <i>a</i> (Å)                                                                                         | 8.8463(3)                      |
| <i>b</i> (Å)                                                                                         | 18.8634(7)                     |
| <i>c</i> (Å)                                                                                         | 20.8662(7)                     |
| $\alpha$ (°)                                                                                         | 113.6650(10)                   |
| $\beta$ (°)                                                                                          | 95.5710(10)                    |
| $\gamma$ (°)                                                                                         | 102.2300(10)                   |
| <i>V</i> (Å <sup>3</sup> )                                                                           | 3051.60(19)                    |
| <i>Z</i>                                                                                             | 2                              |
| <i>F</i> (000)                                                                                       | 1598                           |
| <i>D</i> <sub>calc</sub> (g cm <sup>-3</sup> )                                                       | 1.79                           |
| $\mu$ (mm <sup>-1</sup> )                                                                            | 3.221                          |
| Reflections collected/unique                                                                         | 46674/13992                    |
| <i>R</i> <sub>int</sub>                                                                              | 0.0259                         |
| <i>R</i> <sub>1</sub> <sup>a</sup> / <i>wR</i> <sub>2</sub> <sup>b</sup> [ <i>I</i> >2σ( <i>I</i> )] | 0.0205                         |
| <i>R</i> <sub>1</sub> <sup>a</sup> / <i>wR</i> <sub>2</sub> <sup>b</sup> (all data)                  | 0.0263                         |
| GOF on <i>F</i> <sup>2</sup>                                                                         | 1.047                          |

$${}^a R_1 = \Sigma(|F_0| - |F_C|)/\Sigma|F_0|; {}^b wR_2 = [\Sigma w(|F_0|^2 - |F_C|^2)^2/(\Sigma w|F_0|^2)^2]^{1/2}.$$

**Table S2.** Selected bond lengths (Å) and angles (°) for **JXUST-38<sup>a</sup>**.

|                           |            |                                           |            |
|---------------------------|------------|-------------------------------------------|------------|
| Eu1—O1                    | 2.3360(18) | Eu2—O5 <sup>ii</sup>                      | 2.5215(16) |
| Eu1—O9                    | 2.5018(18) | Eu2—O4                                    | 2.4349(17) |
| Eu1—O7                    | 2.3009(17) | Eu2—O8 <sup>v</sup>                       | 2.3717(18) |
| Eu1—O5                    | 2.5797(17) | Eu3—O3                                    | 2.3346(18) |
| Eu1—O14                   | 2.3724(16) | Eu3—O9 <sup>vi</sup>                      | 2.6063(18) |
| Eu1—O13                   | 2.4064(16) | Eu3—O6 <sup>v</sup>                       | 2.3420(16) |
| Eu1—O15                   | 2.3694(14) | Eu3—O11 <sup>vii</sup>                    | 2.3414(18) |
| Eu1—O15 <sup>i</sup>      | 2.3433(14) | Eu3—O10 <sup>vi</sup>                     | 2.4631(18) |
| Eu2—O2 <sup>ii</sup>      | 2.4438(18) | Eu3—O15 <sup>v</sup>                      | 2.3694(14) |
| O1—Eu1—O5                 | 74.12(6)   | O2 <sup>ii</sup> —Eu2—O5 <sup>ii</sup>    | 71.44(6)   |
| O1—Eu1—O14                | 98.79(7)   | O4—Eu2—O2 <sup>ii</sup>                   | 107.96(6)  |
| O1—Eu1—O13                | 83.80(6)   | O4—Eu2—O5 <sup>ii</sup>                   | 79.04(6)   |
| O1—Eu1—O15                | 148.22(6)  | O8 <sup>vi</sup> —Eu2—O2 <sup>ii</sup>    | 73.21(7)   |
| O1—Eu1—O15 <sup>i</sup>   | 140.62(6)  | O8 <sup>vi</sup> —Eu2—O5 <sup>ii</sup>    | 124.56(6)  |
| O9—Eu1—O5                 | 142.81(5)  | O8 <sup>vi</sup> —Eu2—O4                  | 72.99(6)   |
| O7—Eu1—O1                 | 93.38(7)   | O3—Eu3—O9 <sup>iv</sup>                   | 135.46(6)  |
| O7—Eu1—O9                 | 74.67(6)   | O3—Eu3—O6 <sup>vi</sup>                   | 86.83(6)   |
| O7—Eu1—O5                 | 86.71(6)   | O3—Eu3—O11 <sup>vii</sup>                 | 141.70(7)  |
| O7—Eu1—O14                | 147.86(6)  | O3—Eu3—O10 <sup>iv</sup>                  | 94.48(7)   |
| O7—Eu1—O13                | 141.99(6)  | O3—Eu3—O15 <sup>vi</sup>                  | 131.43(6)  |
| O7—Eu1—O15                | 74.48(6)   | O3—Eu3—O1W                                | 72.31(8)   |
| O7—Eu1—O15 <sup>i</sup>   | 85.16(6)   | O6 <sup>vi</sup> —Eu3—O9 <sup>iv</sup>    | 134.94(6)  |
| O14—Eu1—O9                | 137.23(6)  | O6 <sup>vi</sup> —Eu3—O10 <sup>iv</sup>   | 162.38(7)  |
| O14—Eu1—O5                | 68.49(5)   | O6 <sup>vi</sup> —Eu3—O15 <sup>vi</sup>   | 75.83(5)   |
| O14—Eu1—O13               | 69.31(5)   | O6 <sup>vi</sup> —Eu3—O1W                 | 84.89(8)   |
| O13—Eu1—O9                | 67.95(6)   | O11 <sup>vii</sup> —Eu3—O9 <sup>iv</sup>  | 74.29(6)   |
| O13—Eu1—O5                | 128.00(5)  | O11 <sup>vii</sup> —Eu3—O6 <sup>vi</sup>  | 78.05(6)   |
| O15 <sup>i</sup> —Eu1—O9  | 66.49(5)   | O11 <sup>vii</sup> —Eu3—O10 <sup>iv</sup> | 90.34(7)   |
| O15—Eu1—O9                | 126.90(6)  | O11 <sup>vii</sup> —Eu3—O15 <sup>vi</sup> | 78.68(6)   |
| O15 <sup>i</sup> —Eu1—O5  | 144.68(5)  | O11 <sup>vii</sup> —Eu3—O1W               | 71.45(8)   |
| O15—Eu1—O5                | 75.91(5)   | O10 <sup>iv</sup> —Eu3—O9 <sup>iv</sup>   | 51.24(6)   |
| O15—Eu1—O14               | 79.69(5)   | O15 <sup>vi</sup> —Eu3—O9 <sup>iv</sup>   | 64.41(5)   |
| O15 <sup>i</sup> —Eu1—O14 | 103.10(5)  | O15 <sup>vi</sup> —Eu3—O10 <sup>iv</sup>  | 115.19(6)  |
| O15 <sup>i</sup> —Eu1—O13 | 74.09(5)   | O15 <sup>vi</sup> —Eu3—O1W                | 147.21(7)  |
| O15—Eu1—O13               | 123.79(5)  | O1W—Eu3—O9 <sup>iv</sup>                  | 117.90(7)  |
| O15 <sup>i</sup> —Eu1—O15 | 68.79(6)   | O1W—Eu3—O10 <sup>iv</sup>                 | 78.82(8)   |
| O1—Eu1—O9                 | 75.16(6)   |                                           |            |

<sup>a</sup>Symmetry codes: (i) 2-x, 1-y, 1-z; (ii) -x, -y, -z; (iii) 1+x, 1+y, 1+z; (iv) -1-x, -1-y, -1-z; (v) 1-x, -y, -z; (vi) -1+x, -1+y, -1+z. (vii) 1-x, -y, -1-z.

**Table S3.** SHAPE analysis of the Eu<sup>III</sup> ions in **JXUST-38**.

| <b>JXUST-38</b> |               |                                            |                            |                      |
|-----------------|---------------|--------------------------------------------|----------------------------|----------------------|
| ions            | label         | Shape                                      | symmetry                   | distortion( $\tau$ ) |
|                 | OP-8          | Octagon                                    | $D_{8h}$                   | 30.380               |
|                 | HPY-8         | Heptagonal pyramid                         | $C_{7v}$                   | 23.405               |
|                 | HBPY-8        | Hexagonal bipyramid                        | $D_{6h}$                   | 15.601               |
|                 | CU-8          | Cube                                       | $O_h$                      | 10.762               |
|                 | SAPR-8        | Square antiprism                           | $D_{4d}$                   | 3.679                |
|                 | <b>TDD-8</b>  | <b>Triangular dodecahedron</b>             | <b><math>D_{2d}</math></b> | <b>1.110</b>         |
| Eu1             | JGBF-8        | Johnson gyrobifastigium J26                | $D_{2d}$                   | 12.292               |
|                 | JETBPY-8      | Johnson elongated triangular bipyramid J14 | $D_{3h}$                   | 26.864               |
|                 | JBTPR-8       | Biaugmented trigonal prism J50             | $C_{2v}$                   | 2.533                |
|                 | BTPR-8        | Biaugmented trigonal prism                 | $C_{2v}$                   | 2.548                |
|                 | JSD-8         | Snub diphenoid J84                         | $D_{2d}$                   | 2.775                |
|                 | TT-8          | Triakis tetrahedron                        | $T_d$                      | 11.216               |
|                 | ETBPY-8       | Elongated trigonal bipyramid               | $D_{3h}$                   | 24.465               |
|                 | OP-8          | Octagon                                    | $D_{8h}$                   | 32.300               |
|                 | HPY-8         | Heptagonal pyramid                         | $C_{7v}$                   | 23.455               |
|                 | HBPY-8        | Hexagonal bipyramid                        | $D_{6h}$                   | 12.413               |
|                 | CU-8          | Cube                                       | $O_h$                      | 5.993                |
|                 | <b>SAPR-8</b> | <b>Square antiprism</b>                    | $D_{4d}$                   | <b>1.544</b>         |
|                 | TDD-8         | Triangular dodecahedron                    | <b><math>D_{2d}</math></b> | 1.689                |
| Eu2             | JGBF-8        | Johnson gyrobifastigium J26                | $D_{2d}$                   | 14.525               |
|                 | JETBPY-8      | Johnson elongated triangular bipyramid J14 | $D_{3h}$                   | 27.569               |
|                 | JBTPR-8       | Biaugmented trigonal prism J50             | $C_{2v}$                   | 3.402                |
|                 | BTPR-8        | Biaugmented trigonal prism                 | $C_{2v}$                   | 2.972                |
|                 | JSD-8         | Snub diphenoid J84                         | $D_{2d}$                   | 5.511                |
|                 | TT-8          | Triakis tetrahedron                        | $T_d$                      | 6.870                |
|                 | ETBPY-8       | Elongated trigonal bipyramid               | $D_{3h}$                   | 24.253               |
| <u>Eu3</u>      | OP-8          | Octagon                                    | $D_{8h}$                   | 29.650               |

|               |                                            |          |              |
|---------------|--------------------------------------------|----------|--------------|
| HPY-8         | Heptagonal pyramid                         | $C_{7v}$ | 22.341       |
| HBPY-8        | Hexagonal bipyramid                        | $D_{6h}$ | 14.032       |
| CU-8          | Cube                                       | $O_h$    | 9.008        |
| SAPR-8        | Square antiprism                           | $D_{4d}$ | 2.376        |
| TDD-8         | Triangular dodecahedron                    | $D_{2d}$ | 2.880        |
| JGBF-8        | Johnson gyrobifastigium J26                | $D_{2d}$ | 12.027       |
| JETBPY-8      | Johnson elongated triangular bipyramid J14 | $D_{3h}$ | 26.569       |
| JBTPR-8       | Biaugmented trigonal prism J50             | $C_{2v}$ | 2.121        |
| <b>BTPR-8</b> | <b>Biaugmented trigonal prism</b>          | $C_{2v}$ | <b>1.618</b> |
| JSD-8         | Snub diphenooid J84                        | $D_{2d}$ | 4.692        |
| TT-8          | Triakis tetrahedron                        | $T_d$    | 9.675        |
| ETBPY-8       | Elongated trigonal bipyramid               | $D_{3h}$ | 21.751       |

**Table S4.** Performance comparison of sensors for DPA detection.

| Sensors                                                                                                           | Linear ranges        | LODs                                 | Ref.             |
|-------------------------------------------------------------------------------------------------------------------|----------------------|--------------------------------------|------------------|
| <b>JXUST-38</b>                                                                                                   | 0-78 $\mu\text{M}$   | 0.05 $\mu\text{M}$                   | <b>This work</b> |
| NH <sub>2</sub> -MOF-76(Eu)                                                                                       | 0-100 mM             | 3.8 $\mu\text{M}$                    | S3               |
| [Eu <sub>0.1</sub> Tb <sub>0.9</sub> (NDC <sup>2-</sup> )(H <sub>2</sub> O)Cl]                                    | 0-600 $\mu\text{M}$  | 0.248 $\mu\text{M}$                  |                  |
| [Eu <sub>0.1</sub> Tb <sub>0.9</sub> (BDC <sup>2-</sup> )(H <sub>2</sub> O)Cl]                                    | 0-400 $\mu\text{M}$  | 0.874 $\mu\text{M}$                  | S4               |
| [Eu <sub>0.1</sub> Tb <sub>0.9</sub> (BDC <sup>2-</sup> )(H <sub>2</sub> O)Cl]                                    | 0-300 $\mu\text{M}$  | 2.277 $\mu\text{M}$                  |                  |
| [Tb(NDBC)(COO)]                                                                                                   | 0-1000 $\mu\text{M}$ | 5.21 $\mu\text{M}$                   | S5               |
| Tb <sub>0.875</sub> Eu <sub>0.125</sub> -Hddb                                                                     | 0-400 $\mu\text{M}$  | 0.8494 $\mu\text{M}$                 | S6               |
| Eu/Tb(BTC)                                                                                                        | 0-400 $\mu\text{M}$  | 1087 nM                              | S7               |
| [Tb <sub>0.43</sub> Eu <sub>1.57</sub> (1,4-phda) <sub>3</sub> (H <sub>2</sub> O)](H <sub>2</sub> O) <sub>2</sub> | 0-400 $\mu\text{M}$  | 0.17 $\mu\text{M}$                   | S8               |
| {[Ca <sub>3</sub> (ddpa)·7H <sub>2</sub> O]} <sub>n</sub>                                                         | 0-0.991 mM           | $1.01 \times 10^{-6} \text{ M}^{-1}$ |                  |
| {[Cd <sub>3</sub> (ddpa)·6H <sub>2</sub> O]·4H <sub>2</sub> O} <sub>n</sub>                                       | 0-0.991 mM           | $1.17 \times 10^{-6} \text{ M}^{-1}$ | S9               |
| {[Zn <sub>3</sub> (ddpa)·2H <sub>2</sub> O]} <sub>n</sub>                                                         | 0-0.991 mM           | $2.07 \times 10^{-6} \text{ M}^{-1}$ |                  |

## References

- S1 *SAINT, Version 6.02a*, Bruker AXS Inc, Madison, WI, 2002.
- S2 G. M. Sheldrick, *Acta Crystallogr. Sect. A: Found. Adv.*, 2015, **A71**, 3-8.
- S3 D. Wu, Z. Zhang, X. W. Chen, L. K. Meng, C. G Li, G. H. Li, X. B. Chen, Z. Shi and S. H. Feng, *Chem. Commun.*, 2019, **55**, 14918-14921.
- S4 M. L. Shen, B. Liu, L. Xu and H. Jiao, *J. Mater. Chem. C*, 2020, **8**, 4392-4400.
- S5 M. M. Qiu, K. F. Chen, Q. R. Liu, W. N. Miao, B. Liu and L. Xu, *CrystEngComm*, 2022, **24**, 132-142.
- S6 X. B. Chen, C. X. Qi, Y. B. Xu, H. Li, L. Xu and B. Liu, *J. Mater. Chem. C*, 2020, **8**, 17325-17335.
- S7 M. N. Wu, Y. X. Zhuang, J. B. Liu, W. W. Chen, X. Y. Li and R. J. Xie, *Opt. Mater.*, 2020, **106**, 110006.
- S8 J. Othong, J. Boonmak, F. Kielar, S. Hadsadee, S. Jungsuttiwong and S. Youngme, *Sens. Actuators, B*, 2020, **316**, 128156.
- S9 Z. Z. Cong, M. C. Zhu, Y. Zhang, W. Yao, Marina Kosinova, Vladimir P. Fedin, S. Y. Wu and E. J. Gao, *Dalton Trans.*, 2022, **51**, 250–256.
